# Supplementary material for: Microwave-assisted reduction method under nitrogen atmosphere for synthesis and electrical conductivity improvement of reduced graphene oxide (rGO)
Source: Royal Society of Chemistry journal article supplement (doi:10.1039/c7ra10013b), 2017-01-01
Supplement: c7ra10013b1.pdf [file c7ra10013b1.pdf]

# Microwave-Assisted Reduction Method under Nitrogen Atmosphere for Synthesis and Electrical Conductivity Improvement of reduced Graphene Oxide (rGO)

Ferry Iskandar,<sup>a,b</sup> Utiya Hikmah,<sup>a</sup> Erythrina Stavila,<sup>b</sup> and Akfyny H. Aimon<sup>a</sup>

<sup>a</sup>Department of Physics, Faculty of Mathematics and Natural Sciences, Institut Teknologi Bandung, Jl. Ganesha 10 Bandung, 40132, Indonesia.

<sup>b</sup>Research Center for Nanosciences and Nanotechnology (RCNN), Institut Teknologi Bandung, Jl. Ganesha 10 Bandung, 40132, Indonesia.

\*Author for correspondence:

Dr. Eng. Ferry Iskandar

Phone: +62222500834

E-mail: [ferry@fi.itb.ac.id](mailto:ferry@fi.itb.ac.id)

## 1. Supplementary Information Experimental Section

### 1.1 Microwave setup for reduction of graphene oxide (GO)

The reduction process of graphene oxide assisted by microwave under nitrogen atmosphere.

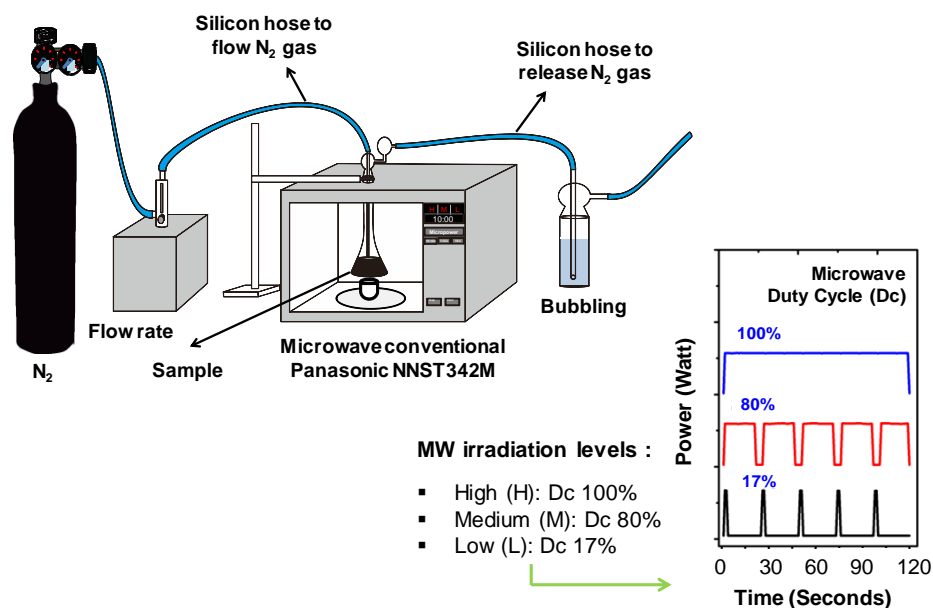

Fig. S1 Illustration of equipment design for reduction of GO microwave-assisted under N<sub>2</sub> atmosphere conditions

## 1.2 Electrical conductivity measurement of Reduced Graphene Oxide (rGO)

The rGO powder was prepared as pellet using Lab press equipment before measuring the electrical conductivity.

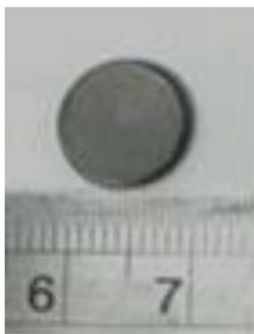

Fig. S2 Sample picture of rGO pellet prepared by pressed equipment

## 1.3 ATR-FTIR spectra for rGO with and without Microwave irradiation

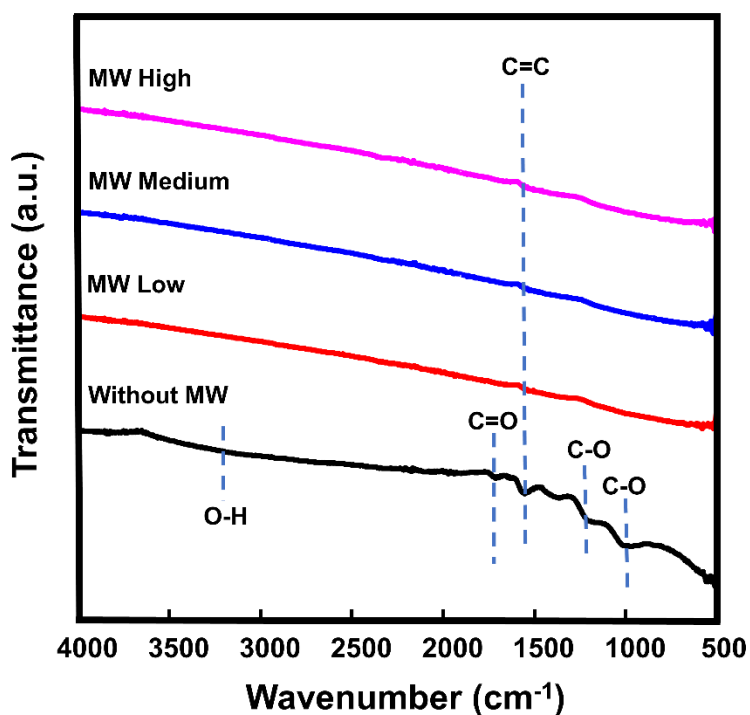

Fig. S3 ATR-FTIR spectra of reduction GO samples with various treatment: without microwave irradiation, and with various microwave irradiation level (high, medium, low) for 5 minutes

## 1.4 Characterization results of rGO and rGO-LAA

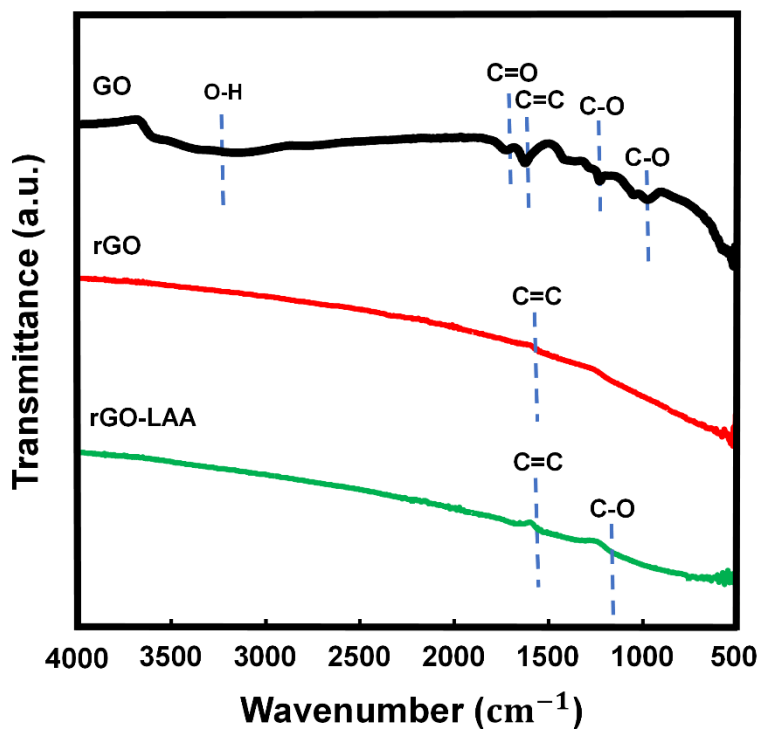

Fig. S4 ATR-FTIR spectra of GO, rGO by hydrazine hydrate, and rGO by L-AA

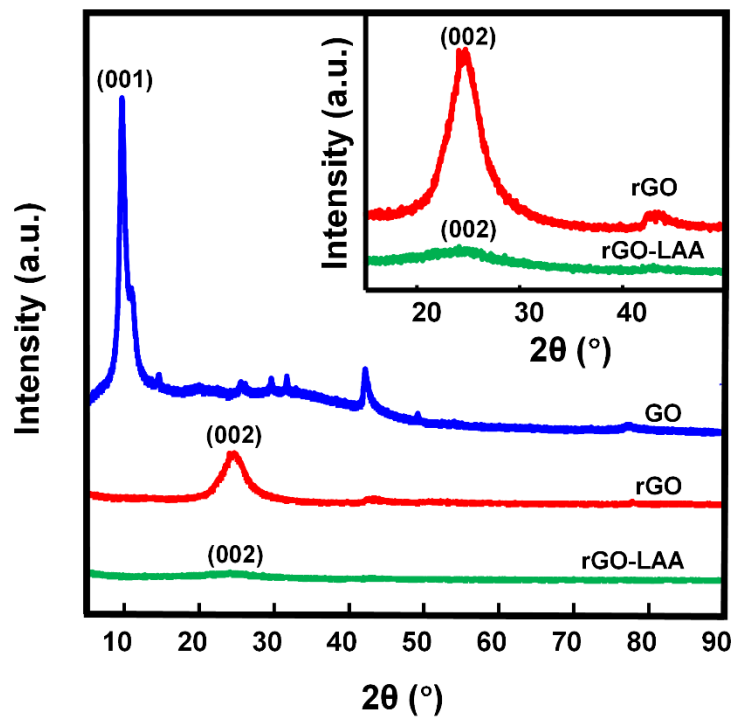

Fig. S5 XRD spectra of GO, rGO reduced by hydrazine hydrate and rGO reduced by L-AA

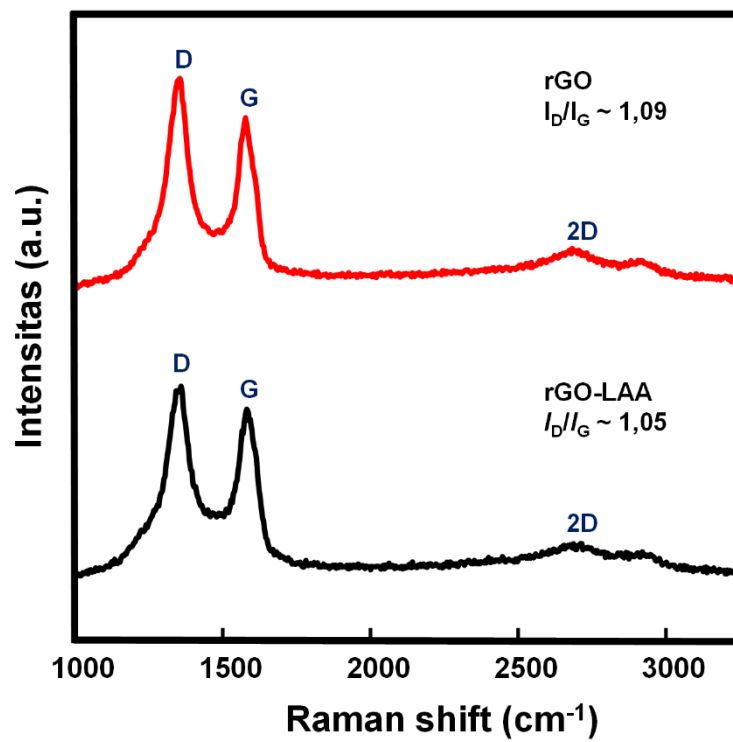

Fig. S6. Raman spectrum of rGO and rGO-LAA

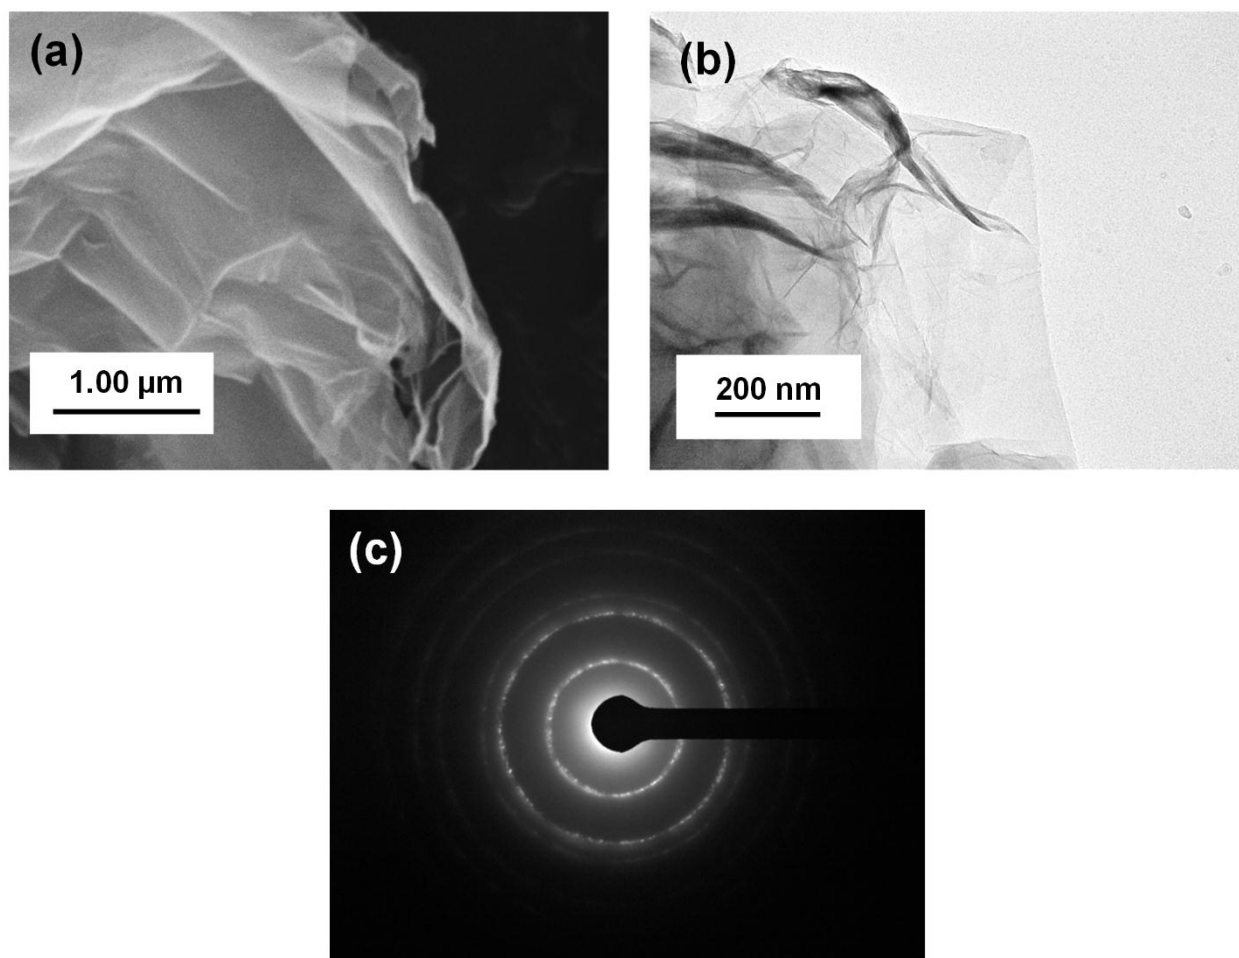

Fig. S7 Pictures of (a) SEM, (b) TEM, and (c) SAED pattern of rGO by L-AA
